# Supplementary material for: Influence of the particle size of encapsulated chia oil on the oil release and bioaccessibility during in vitro gastrointestinal digestion
Source: Royal Society of Chemistry journal article supplement (doi:10.1039/d1fo03688b), 2022-01-01
Supplement: d1fo03688b1.pdf [file d1fo03688b1.pdf]

**Table 1.** Characterization of chia oil (CO) and purified CO (PCO)

|                                         | CO                       | PCO                      |
|-----------------------------------------|--------------------------|--------------------------|
| <b>Fatty acid profile (% FAME)</b>      |                          |                          |
| C16:0                                   | 7.0 ± 2.1 <sup>a</sup>   | 6.0 ± 1.1 <sup>a</sup>   |
| C18:0                                   | 3.5 ± 0.1 <sup>a</sup>   | 3.0 ± 0.4 <sup>a</sup>   |
| C18:1 n-9                               | 7.9 ± 0.1 <sup>b</sup>   | 7.7 ± 0.5 <sup>b</sup>   |
| C18:2 n-6                               | 19.4 ± 0.2 <sup>b</sup>  | 18.5 ± 1.2 <sup>b</sup>  |
| C18:3 n-3                               | 65.9 ± 0.3 <sup>b</sup>  | 64.8 ± 1.3 <sup>b</sup>  |
| <b>Tocopheroles (mg/kg)</b>             |                          |                          |
| α                                       | 5.1 ± 0.2                | nd                       |
| γ                                       | 282.6 ± 3.3              | nd                       |
| δ                                       | 49.9 ± 1.2               | nd                       |
| Free acidity (%)                        | 1.46 ± 0.01 <sup>b</sup> | 0.07 ± 0.02 <sup>a</sup> |
| Peroxide value (mEq O <sub>2</sub> /kg) | 0.30 ± 0.05 <sup>c</sup> | 0.06 ± 0.02 <sup>d</sup> |
| Induction time (h)                      | 3.2 ± 0.05 <sup>c</sup>  | 0.3 ± 0.02 <sup>d</sup>  |

CO: chia oil; PCO: purified chia oil; FAME: fatty acid methyl esters; nd: non detected. Different letters in the same row indicate significant ( $p < 0.05$ ) differences between CO and PCO.
